# Supplementary material for: From highly oriented bulk black arsenic phosphorus to well-crystallized exfoliated flakes with enhanced anti-oxidation: precise control upon chemical vapor transport
Source: Royal Society of Chemistry journal article supplement (doi:10.1039/d3tc00338h), 2023-01-01
Supplement: d3tc00338h1.pdf [file d3tc00338h1.pdf]

## Supporting Information

### From highly-oriented bulk black arsenic phosphorus to well-crystallized exfoliated flakes with enhanced anti-oxidation: precise control upon chemical vapor transport

Jiaqi Song<sup>a</sup>, Liyuan Chai<sup>a, b</sup>, Yanjie Liang<sup>a, b</sup>, Haiying Wang<sup>a, b</sup>, Zhang Lin<sup>a, b</sup>, Zhenxing Liu<sup>a</sup>,

Yi Liao<sup>a</sup>, Xinting Lai<sup>a</sup>, Cong Peng<sup>a, b \*</sup>

<sup>a</sup> School of Metallurgy and Environment, Central South University, Changsha 410083, China

<sup>b</sup> Chinese National Engineering Research Center for Control & Treatment of Heavy Metal Pollution, Changsha 410083, China

\*Corresponding author: pengcong0704@csu.edu.cn (Cong Peng)

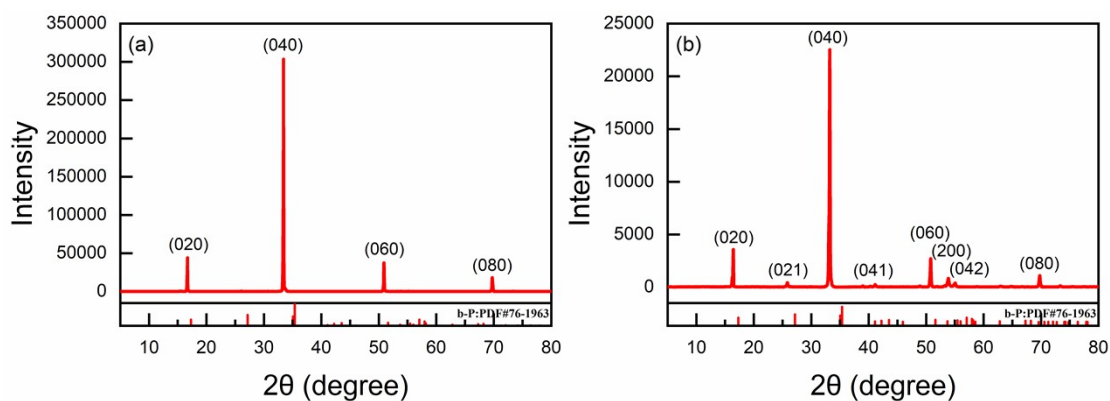

Fig. S1 XRD patterns of (a) highly-oriented b-AsP and (b) b-AsP-Control.

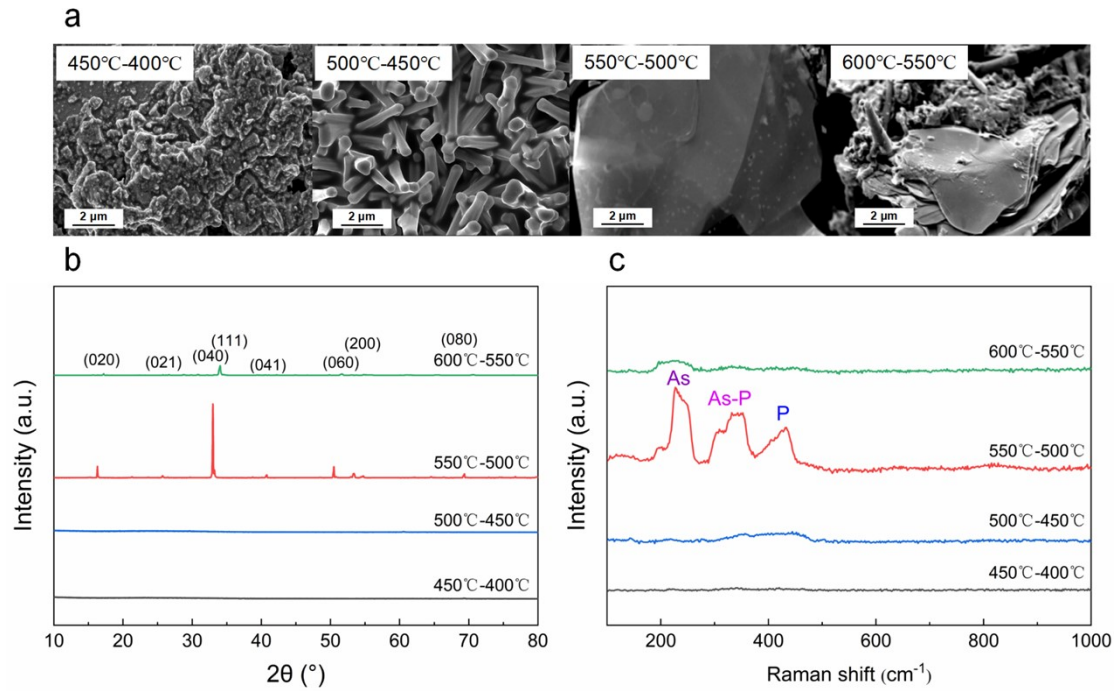

Fig. S2 (a) SEM image, (b) XRD pattern and (c) Raman spectra of products synthesized by different temperature fields (pressure field: 10 atm, atomic ratio of As:P: 4:1, amounts of  $\text{SnI}_4$ : 2 wt%, reacting time: 10 h, cooling time: 2 h).

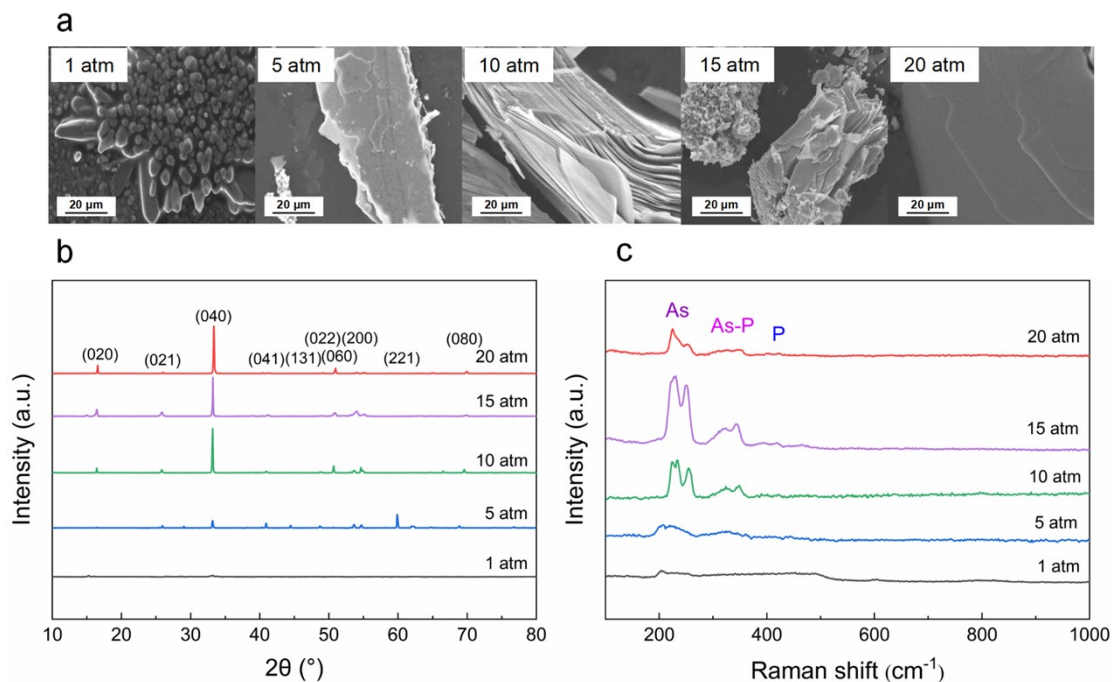

Fig. S3 (a) SEM image, (b) XRD pattern and (c) Raman spectra of products synthesized by different pressure fields (temperature field: 550°C-500°C, atomic ratio of As:P: 4:1, amounts of  $\text{SnI}_4$ : 2 wt%, reacting time: 10 h, cooling time: 2 h).

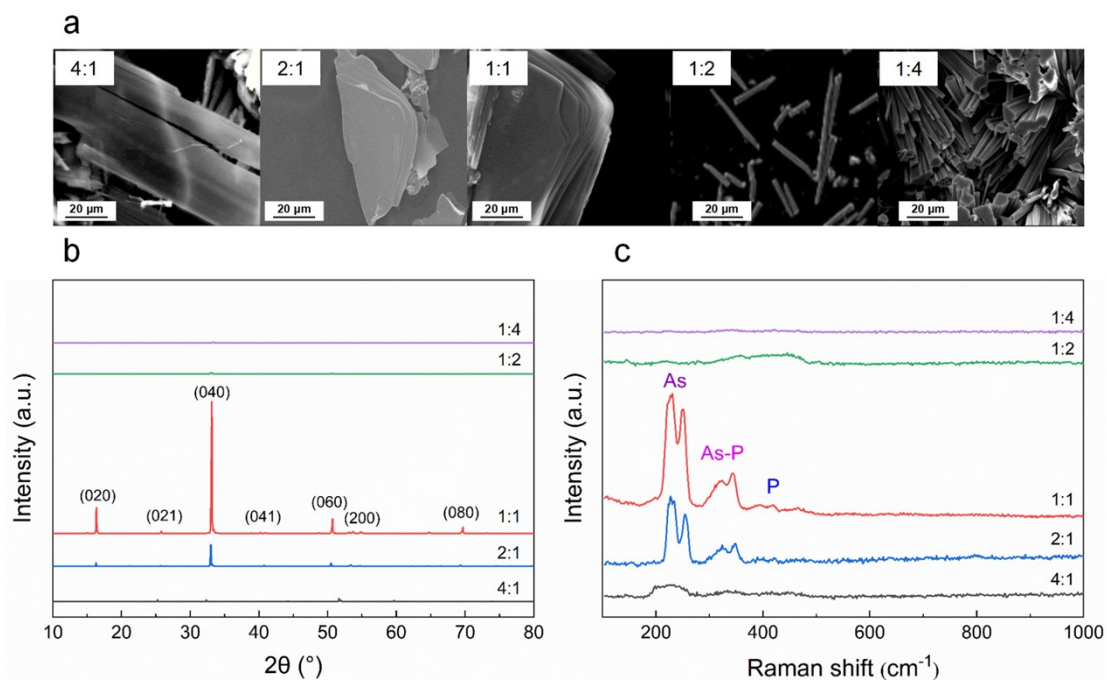

Fig. S4 (a) SEM image, (b) XRD pattern and (c) Raman spectra of products synthesized by different atomic ratio of As:P (temperature field: 550°C-500°C, pressure field: 20 atm, amounts of  $\text{SnI}_4$ : 2 wt%, reacting time: 10 h, cooling time: 2 h).

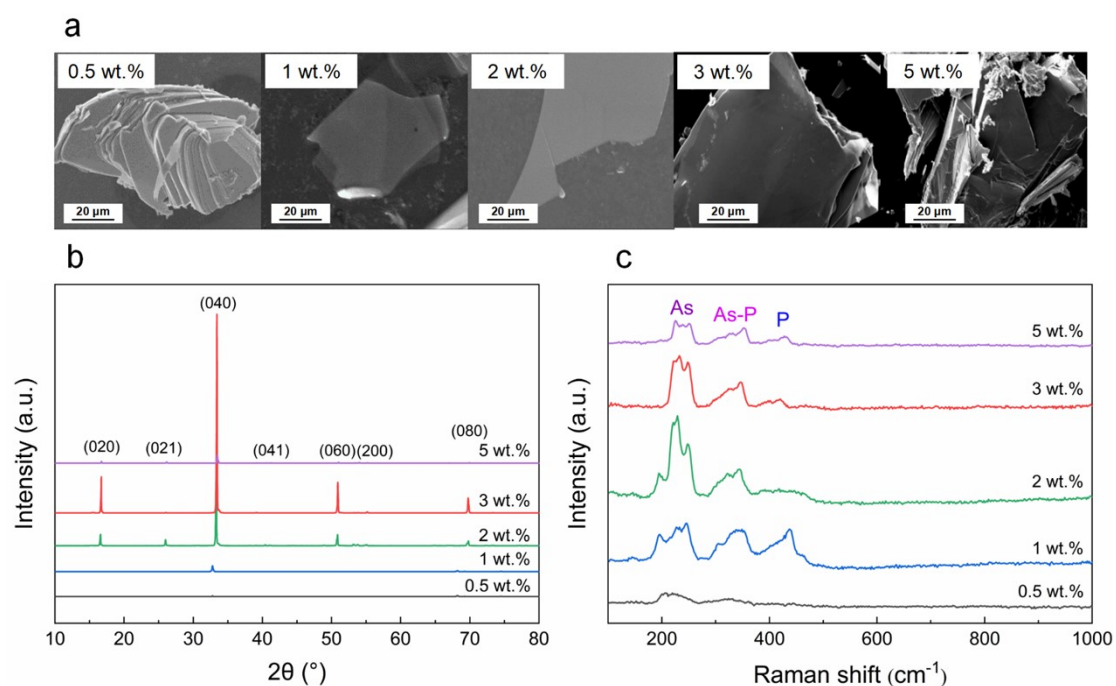

Fig. S5 (a) SEM image, (b) XRD pattern and (c) Raman spectra of products synthesized by different amounts of  $\text{SnI}_4$  (temperature field: 550°C-500°C, pressure field: 20 atm, atomic ratio of As:P: 1:1, reacting time: 20 h, cooling time: 2 h).

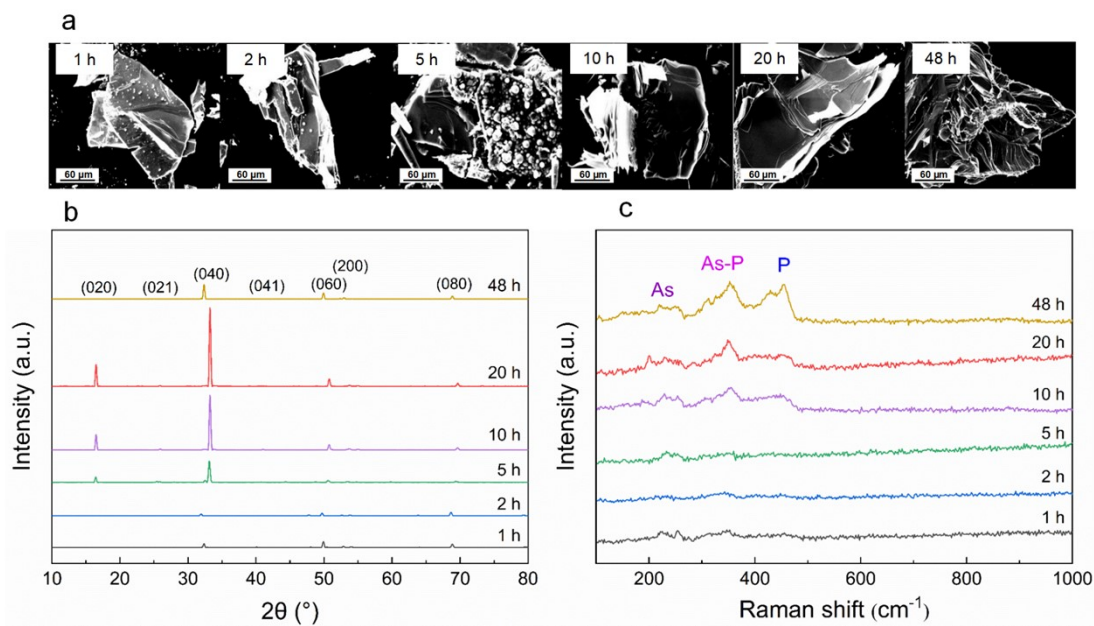

Fig. S6 (a) SEM image, (b) XRD pattern and (c) Raman spectra of products synthesized by different reacting time (temperature field: 550°C-500°C, pressure field: 20 atm, atomic ratio of As:P: 1:1, amounts of SnI<sub>4</sub>: 2 wt%, cooling time: 2 h).

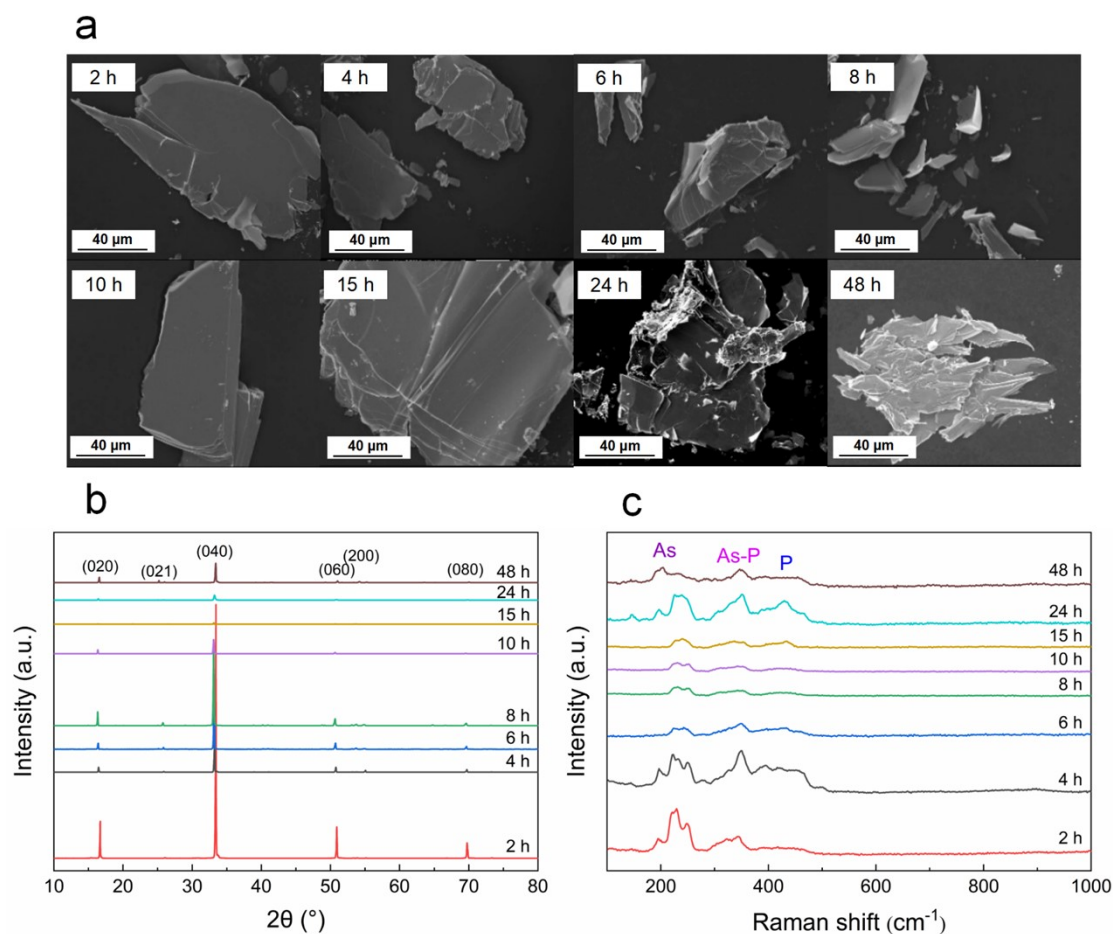

Fig. S7 (a) SEM image, (b) XRD pattern and (c) Raman spectra of products synthesized

by different cooling time (temperature field: 550°C-500°C, pressure field: 20 atm, atomic ratio of As:P: 1:1, amounts of SnI<sub>4</sub>: 3 wt%, reacting time: 20 h,).

Table S1 Elemental composition of highly-oriented b-AsP crystals obtained under optimal conditions by SEM-EDS.

| Element type    | As    | P     | Sn | I    |
|-----------------|-------|-------|----|------|
| Content (atom%) | 73.25 | 26.38 | -  | 0.37 |

Table S2 Elemental composition of highly-oriented exfoliated b-AsP flakes obtained under optimal conditions by TEM-EDS.

| Element type    | As    | P     | Sn   | I    |
|-----------------|-------|-------|------|------|
| Content (atom%) | 70.77 | 27.93 | 0.63 | 0.67 |

Table S3 Elemental composition of products synthesized under different system by SEM-EDS.

| Product type          | As (at.%) | P (at.%) | I (at.%) | Sn (at.%) |
|-----------------------|-----------|----------|----------|-----------|
| Highly-oriented b-AsP | 73.25     | 26.38    | 0.37     | -         |
| b-AsP-Control         | 74.56     | 23.48    | 0.49     | 1.47      |

Table S4 Comparison of peak intensity, (010) degree of orientation and (040) full width at half maxima in XRD patterns between b-AsP products synthesized by different process conditions.

| Process conditions types    | Parameters   | (040) peak intensity (°) | (021) peak intensity (°) | (010) degree of orientation | (040) full width at half maxima |
|-----------------------------|--------------|--------------------------|--------------------------|-----------------------------|---------------------------------|
| Temperature field           | 450°C-400°C  | -                        | -                        | -                           | -                               |
|                             | 500°C-450°C  | -                        | -                        | -                           | -                               |
|                             | 550°C-500°C  | 14156                    | 116                      | 122.03                      | 0.13                            |
|                             | 600°C-550°C  | 1833                     | 89                       | 20.60                       | 0.25                            |
| Pressure field              | 1 atm        | -                        | -                        | -                           | -                               |
|                             | 5 atm        | 865                      | 273                      | 3.17                        | 0.15                            |
|                             | 10 atm       | 5221                     | 363                      | 14.38                       | 0.13                            |
|                             | 15 atm       | 4613                     | 490                      | 9.41                        | 0.14                            |
|                             | 20 atm       | 5603                     | 131                      | 42.77                       | 0.16                            |
| Atomic ratio of As:P        | 4:1          | 1009                     | 1231                     | 0.82                        | 0.08                            |
|                             | 2:1          | 14156                    | 383                      | 36.96                       | 0.13                            |
|                             | 1:1          | 86065                    | 1526                     | 56.40                       | 0.13                            |
|                             | 1:2          | 845                      | -                        | -                           | 0.22                            |
|                             | 1:4          | -                        | -                        | -                           | -                               |
| Amounts of SnI <sub>4</sub> | 0.5 wt.%     | 863                      | 41                       | 21.05                       | 0.11                            |
|                             | 1 wt.%       | 6993                     | 332                      | 21.06                       | 0.18                            |
|                             | 2 wt.%       | 105682                   | 7453                     | 14.18                       | 0.14                            |
|                             | 3 wt.%       | 243596                   | 667                      | 365.21                      | 0.08                            |
|                             | 5 wt.%       | 9700                     | 1507                     | 6.44                        | 0.13                            |
| Reacting time               | 1 h          | 1160                     | 35                       | 33.14                       | 0.28                            |
|                             | 2 h          | 559                      | 27                       | 20.70                       | 0.24                            |
|                             | 5 h          | 6723                     | 309                      | 21.76                       | 0.28                            |
|                             | 10 h         | 17283                    | 297                      | 58.19                       | 0.24                            |
|                             | 20 h         | 24797                    | 231                      | 107.35                      | 0.24                            |
|                             | 48 h         | 4537                     | 104                      | 43.63                       | 0.24                            |
|                             | Cooling time | 2 h                      | 303596                   | 667                         | 455.17                          |
| 4 h                         |              | 40136                    | 798                      | 50.30                       | 0.12                            |
| 6h                          |              | 60522                    | 2080                     | 29.10                       | 0.14                            |
| 8h                          |              | 89295                    | 3414                     | 26.16                       | 0.13                            |
| 10 h                        |              | 17123                    | 191                      | 89.65                       | 0.16                            |
| 15 h                        |              | 1578                     | 76                       | 20.76                       | 0.11                            |
| 24 h                        |              | 5816                     | 174                      | 33.43                       | 0.22                            |
| 48 h                        |              | 23169                    | 734                      | 31.57                       | 0.13                            |
